# Supplementary material
Source: PubMed Central journal article supplement (PMC7748066)
Supplement: NIHMS1640284-supplement-Supp_Tables_1-4.pdf [file NIHMS1640284-supplement-Supp_Tables_1-4.pdf]

**SUPPLEMENTAL TABLES**

**eTable 1. Association between the market entry of biosimilar filgrastim and patient out-of-pocket costs for branded filgrastim products**

|                                                          | <b>Change in Average Patient Out-of-Pocket Cost for<br/>480 mcg of Branded Filgrastim<br/>(in U.S. Dollars <sup>a</sup>)</b> |                                  |
|----------------------------------------------------------|------------------------------------------------------------------------------------------------------------------------------|----------------------------------|
|                                                          | <b>Level Change <sup>b</sup></b>                                                                                             | <b>Slope Change <sup>c</sup></b> |
| Total Patient Out-of-Pocket Costs,<br>Estimate, (95% CI) | -0.20 (-5.29: 4.90)                                                                                                          | -0.08 (-0.41: 0.24)              |
| <b>By Type of Cost<br/>Estimate, (95% CI)</b>            |                                                                                                                              |                                  |
| Coinsurance                                              | -1.50 (-3.29: 0.28)                                                                                                          | 0.06 (-0.08: 0.19)               |
| Copayment                                                | 3.72 (-0.24: 7.68)                                                                                                           | 0.16 (-0.11: 0.38)               |
| Deductible                                               | -0.77 (-3.78: 2.24)                                                                                                          | -0.13 (-0.35: 0.08)              |

<sup>a</sup> Costs adjusted for inflation using the Medical Care Consumer Price Index and all amounts are presented in January 2014 U.S. Dollars

<sup>b</sup> Level change represents the average change in costs following the intervention point (February 2016)

<sup>c</sup> Slope change represents the average monthly change in cost trend over the post-intervention period relative to the baseline trend

\*p <0.05

**eTable 2. Sensitivity Analysis: Association between the market entry of biosimilar filgrastim, claims payments and patient out-of-pocket costs <sup>a</sup>**

|                                                     | Change in Average Amounts for 480 mcg of Branded Filgrastim<br>(in U.S. Dollars <sup>b</sup> ) |                           |
|-----------------------------------------------------|------------------------------------------------------------------------------------------------|---------------------------|
|                                                     | Level Change <sup>c</sup>                                                                      | Slope Change <sup>d</sup> |
| All Branded Filgrastim products, Estimate, (95% CI) | -33.41 (-58.97: -7.85) *                                                                       | -2.99 (-4.43: -1.54) *    |
| Patient Out-of-Pocket Costs. Estimate, (95% CI)     | -3.97 (-20.12: 12.17)                                                                          | -0.02 (-0.83: 0.78)       |

<sup>a</sup> In this sensitivity analysis, the “pre-intervention” trend was based on data from January 2014 to March 2015 (filgrastim-sndz approval date) only.

<sup>b</sup> Amounts adjusted for inflation using the Medical Care Consumer Price Index and all amounts are presented in January 2014 U.S. Dollars

<sup>c</sup> Level change represents the average change in claims payments or patient out-of-pocket costs following the intervention point (February 2016)

<sup>d</sup> Slope change represents the average monthly change in cost trend over the post-intervention period relative to the baseline trend

\*p<0.01

**eTable 3. Sensitivity Analysis: Association between the market entry of biosimilar filgrastim, claims payments and patient out-of-pocket costs for referent filgrastim<sup>a</sup>**

|                                                         | <b>Change in Average Amounts for 480 mcg of Branded Filgrastim (in U.S. Dollars <sup>b</sup>)</b> |                                  |
|---------------------------------------------------------|---------------------------------------------------------------------------------------------------|----------------------------------|
|                                                         | <b>Level Change <sup>c</sup></b>                                                                  | <b>Slope Change <sup>d</sup></b> |
| Referent filgrastim claims payments, Estimate, (95% CI) | -29.62 (-38.85: -20.39) *                                                                         | -3.14 (-3.80: -2.48) *           |
| Patient Out-of-Pocket Costs. Estimate, (95% CI)         | -0.37 (-5.75: 5.01)                                                                               | -0.23 (-0.57: 0.10)              |

<sup>a</sup> In this sensitivity analysis, the analytical sample was restricted to referent filgrastim claims only.

<sup>b</sup> Amounts adjusted for inflation using the Medical Care Consumer Price Index and all amounts are presented in January 2014 U.S. Dollars

<sup>c</sup> Level change represents the average change in claims payments or patient out-of-pocket costs following the intervention point (February 2016)

<sup>d</sup> Slope change represents the average monthly change in cost trend over the post-intervention period relative to the baseline trend

\*p<0.01

**eTable 4. Sensitivity Analysis: Association between the market entry of biosimilar filgrastim, claims payments and patient out-of-pocket costs <sup>a</sup>**

|                                                         | <b>Change in Average Amounts for 480 mcg of Branded Filgrastim (in U.S. Dollars <sup>b</sup>)</b> |                                  |
|---------------------------------------------------------|---------------------------------------------------------------------------------------------------|----------------------------------|
|                                                         | <b>Level Change <sup>c</sup></b>                                                                  | <b>Slope Change <sup>d</sup></b> |
| Referent filgrastim claims payments, Estimate, (95% CI) | -28.46 (-38.10: -18.81) *                                                                         | -3.18 (-3.96: -2.40) *           |
| Patient Out-of-Pocket Costs. Estimate, (95% CI)         | -1.58 (-5.78: 2.61)                                                                               | 0.06 (-0.21: 0.33)               |

<sup>a</sup> In this sensitivity analysis, the analytical sample was restricted to claims for 300 mcg, 480 mcg or a combination of both.

<sup>b</sup> Amounts adjusted for inflation using the Medical Care Consumer Price Index and all amounts are presented in January 2014 U.S. Dollars

<sup>c</sup> Level change represents the average change in claims payments or patient out-of-pocket costs following the intervention point (February 2016)

<sup>d</sup> Slope change represents the average monthly change in cost trend over the post-intervention period relative to the baseline trend

\*p<0.01
